# Supplementary material
Source: PubMed Central journal article supplement (PMC6003502)
Supplement: pnas.1722154115.sapp.pdf [file pnas.1722154115.sapp.pdf]

# Supplementary info for "Physics of Lumen growth"

Sabyasachi Dasgupta<sup>a,b</sup>, Kapish Gupta<sup>a</sup>, Yue Zhang<sup>a</sup>, Virgile Viasnoff<sup>a,c,d,1</sup>, and Jacques Prost<sup>a,b</sup>

<sup>a</sup>Mechanobiology Institute, National University of Singapore, Singapore 117411, Singapore; <sup>b</sup>Laboratoire Physico Chimie Curie, Institut Curie, PSL Research University, CNRS UMR168, 75005 Paris, France; <sup>c</sup>CNRS UMI3639, Singapore 117411, Singapore; <sup>d</sup>Department of Biological Sciences, National University of Singapore, Singapore 117411, Singapore

## Supplementary info

**SI(1): Hepatocyte culture conditions.** Hepatocytes were isolated from male Wistar rats by *in situ* collagenase perfusion method. The animals were obtained from InVivos, Singapore. Animals were handled in accordance to the IACUC protocol approved by the IACUC committee of the National University of Singapore. Isolated hepatocytes were cultured in collagen sandwich for 48 hours. These cells were then treated with UDCA (20,40, 60, 80,100  $\mu\text{M}$ ) or Blebbistatin(1  $\mu\text{M}$ ) and imaged at a intervals of 90 seconds using an inverted wide-field fluorescence microscope (Nikon Biostation IMQ) for 3-4 hours.

**SI(2): Justifications for orders of magnitude.** In the numerical calculations we have used normalized units  $nu$ , such that  $k_B T^{nu} = 1$  corresponds to  $k_B T = 4.10^{-21}$  joule,  $L^{nu} = 1$  corresponds to  $L = 10^{-5}m$ , and  $t^{nu} = t/\tau$  such that  $\Lambda_V^{nu} = 1$ . This last choice implies  $\tau$  values of a few  $10^{11}s$  knowing that typical permeation coefficients are of the order of  $10^{-11}\text{m}/\text{Pa}\cdot\text{s}$ . Straightforward expressions follow for the normalized units of densities and osmotic pressures  $\delta\rho^{nu} = L^3\delta\rho = \delta\pi^{nu}$ . The pressure and surface tension units follow these rescaling in a simple way:  $\delta P^{nu} = L^3\delta P/k_B T$  and  $\sigma^{nu} = L^2\sigma/k_B T$ . We have investigated reasonable parameters values. The choice of orders of magnitude of the screening length and the ion transport coefficient require some more analysis. From Eq.(4) one easily sees that  $\Lambda = \Lambda_i k_B T \rho_{cell}$  has the dimension of a velocity. It is not easy to find experimental values of either  $\Lambda$  or  $\Lambda_i$ . However one finds easily conductivity values. If one recognizes that the real driving force is not the electric potential but the electrochemical potential, one can easily infer from conductivity data the values of  $\Lambda_i$ . One can infer  $\Lambda \simeq 10^7 m\cdot s^{-1}$  and hence  $\Lambda^{nu} \simeq 10^9 - 10^{10}$ . The estimate of  $\xi_i^2 = Dw_0/2\Lambda$  follows immediately. Taking a reasonable value for an ion diffusion coefficient  $D \simeq 10^{-10}m^2s^{-1}$  and  $w_0 = 40\text{nm}$  one obtains  $\xi_i$  a few microns and  $\xi_i^{nu} = \xi_i/\Lambda$  a few  $10^{-1}$ . Last  $\xi_V^2 = K_V/(2\Lambda_V)$ ; to our knowledge, there have been no measurement of  $K_V$  up to now. A purely hydrodynamic estimate would give  $K_V = w_0^3/12\eta$  in which  $\eta$  is the fluid viscosity in the cleft. The difficulty here is to choose  $\eta$ . If we take hundred time that of water, which is of the order of the 'ill defined' plasma viscosity, and the already used order of magnitude for  $\Lambda$  one winds up with a fluid screening length again of the order of a few microns. Note that the uncertainty on the exact values of the parameters is not as bad as it seems since they come in a square root. As a consequence we have investigated  $\xi_V^{nu}$  in the  $10^{-1}$  range. SI Appendix Table (S1) sums up the investigated domain range of the relevant parameters.

Now, we justify our approximation of a constant cleft thickness. We rewrite Eq (2) in a slightly different form:

$$\frac{\delta P}{k} = (e - e_0) - \xi_e^2 \nabla^2 e, \quad [1]$$

in which the length  $\xi_e = \sqrt{\frac{\sigma}{k}}$  expresses the length scale over which thickness changes occur under localized solicitations. Whenever  $\delta P$  is comparable to the cell Laplace pressure,  $e - e_0$  is of order  $\frac{\sigma}{Lk}$ . Taking  $\sigma = \text{a few } 10^{-4} \text{nm}^{-1}$  and  $k = \text{a few } 10^{12} \text{nm}^{-3}$  and  $L = 10^{-5}m$  we find  $e - e_0 = \text{a few } 10^{-11}m$  from which we deduce  $\frac{e - e_0}{e_0}$  of order  $10^{-3}$ . Thus the thickness of the cleft is close to the optimal thickness, up to a distance of order  $\xi_e$  from the lumen. This result holds in regions which are not subjected to localized forces. The same values of  $\sigma$  and  $k$  lead to  $\xi_e$  of the order of the cleft thickness. Thus the approximation of constant thickness breaks down only at a nanoscopic scale, in the region where lumen and cleft merge.

Last we justify the local equilibrium approximation leading to the use of Eqs. (9) and (12) in the dynamical set of equations. The largest time for reaching local equilibrium ion density is  $\tau_i = \frac{L^2}{D}$ . With  $L \simeq 10\mu\text{m}$  and  $D \simeq 10^{-10}m^2s^{-1}$  we obtain  $\tau_i \simeq .25s$ . Similarly, the largest time for reaching local volume flux equilibrium is  $\tau_V = \frac{L^2}{K_V k}$ ; with  $L \simeq 10\mu\text{m}$ ,  $K_V \simeq 10^{-22}m^3Pa^{-1}s^{-1}$  one obtains  $\tau_V \simeq 1s$ . Both times are significantly shorter than experimental times which are of the order of tens of minutes, hence the validity of Eqs. (9) and (12) in which  $r_l$  is a function of time.

**SI(3): Analytical solutions of steady states in cleft.** The solution to Eq.(9) reads:

$$\delta\rho(r) = \frac{I_0\left(\frac{r}{\xi_i}\right) \left[ (\delta\rho_i - \delta\rho_{ext})K_0\left(\frac{r_l}{\xi_i}\right) + (\delta\rho_{lum} - \delta\rho_i)K_0\left(\frac{r}{\xi_i}\right) \right]}{\left[ K_0\left(\frac{r}{\xi_i}\right)I_0\left(\frac{r_l}{\xi_i}\right) - I_0\left(\frac{r}{\xi_i}\right)K_0\left(\frac{r_l}{\xi_i}\right) \right]} + \frac{I_0\left(\frac{r_l}{\xi_i}\right) \left[ (\delta\rho_{ext} - \delta\rho_i)K_0\left(\frac{r}{\xi_i}\right) + \delta\rho_i K_0\left(\frac{r}{\xi_i}\right) \right]}{\left[ K_0\left(\frac{r}{\xi_i}\right)I_0\left(\frac{r_l}{\xi_i}\right) - I_0\left(\frac{r}{\xi_i}\right)K_0\left(\frac{r_l}{\xi_i}\right) \right]} + \frac{I_0\left(\frac{r}{\xi_i}\right) \left[ (\delta\rho_i - \delta\rho_{lum})K_0\left(\frac{r}{\xi_i}\right) - \delta\rho_i K_0\left(\frac{r_l}{\xi_i}\right) \right]}{\left[ K_0\left(\frac{r}{\xi_i}\right)I_0\left(\frac{r_l}{\xi_i}\right) - I_0\left(\frac{r}{\xi_i}\right)K_0\left(\frac{r_l}{\xi_i}\right) \right]}. \quad [2]$$

One can check directly that if the distance from any extremity is large compared to the screening length  $\xi_i$ , the value of the ion density is simply set by the source, i.e  $\delta\rho(r) = \delta\rho_i$ . The Bessel functions  $K_0$  and  $I_0$  can be thought of in a loose sense as generalizations of exponential functions for two dimensional laplacian problems; they do show exponential screening.

The solution to Eq.(12) has a similar structure:

$$\begin{aligned} \delta P(r) = & \frac{K_0\left(\frac{r}{\xi_V}\right) \left( I_0\left(\frac{L}{\xi_V}\right) \left( \xi_V^2(\delta P - 2k_B T \delta\rho_i) - \xi_i^2(\delta P - 2k_B T \delta\rho) \right) + I_0\left(\frac{r_l}{\xi_V}\right) \left( \xi_i^2(\delta P_{ext} - 2k_B T \delta\rho_{ext}) - \xi_V^2(\delta P_{ext} - 2k_B T \delta\rho_i) \right) \right)}{(\xi_i - \xi_V)(\xi_i + \xi_V) \left( K_0\left(\frac{L}{\xi_V}\right) I_0\left(\frac{r_l}{\xi_V}\right) - I_0\left(\frac{L}{\xi_V}\right) K_0\left(\frac{r_l}{\xi_V}\right) \right)} \\ & + \frac{I_0\left(\frac{r}{\xi_V}\right) \left( K_0\left(\frac{L}{\xi_V}\right) \left( \xi_i^2(\delta P - 2k_B T \delta\rho) - \xi_V^2(\delta P - 2k_B T \delta\rho_i) \right) + K_0\left(\frac{r_l}{\xi_V}\right) \left( \xi_V^2(\delta P_{ext} - 2k_B T \delta\rho_i) - \xi_i^2(\delta P_{ext} - 2k_B T \delta\rho_{ext}) \right) \right)}{(\xi_i - \xi_V)(\xi_i + \xi_V) \left( K_0\left(\frac{L}{\xi_V}\right) I_0\left(\frac{r_l}{\xi_V}\right) - I_0\left(\frac{L}{\xi_V}\right) K_0\left(\frac{r_l}{\xi_V}\right) \right)} \\ & + 2k_B T \left\{ \frac{K_0\left(\frac{r}{\xi_i}\right) \left( (\delta\rho_i - \delta\rho) I_0\left(\frac{L}{\xi_i}\right) + (\delta\rho_{ext} - \delta\rho_i) I_0\left(\frac{r_l}{\xi_i}\right) \right) + I_0\left(\frac{r}{\xi_i}\right) \left( (\delta\rho - \delta\rho_i) K_0\left(\frac{L}{\xi_i}\right) + (\delta\rho_i - \delta\rho_{ext}) K_0\left(\frac{r_l}{\xi_i}\right) \right)}{\left( 1 - \frac{\xi_V^2}{\xi_i^2} \right) \left( K_0\left(\frac{L}{\xi_i}\right) I_0\left(\frac{r_l}{\xi_i}\right) - I_0\left(\frac{L}{\xi_i}\right) K_0\left(\frac{r_l}{\xi_i}\right) \right)} + \delta\rho_i \right\} \end{aligned} \quad [3]$$

Even though, the expression is more complex than that of the ion density, it shares with it the feature that if the distance to boundaries is larger than both screening lengths  $\xi_i$  and  $\xi_V$  then the pressure is simply determined by the osmotic pressure corresponding to the excess ion density  $\delta\rho_i$ . Note that because the source term in Eq.(12) depends on space in a non trivial way, the two screening lengths play a role in this expression.

**SI (4): derivation of the dynamical equations for lumen growth.** We derive here the equations for the dynamics of the lumen growth with the variables  $R, \theta, \delta\rho$ . For that, we must satisfy as explained in the main text, force balance and conservation laws, in the lumen and simultaneously in the paracellular domain.

The ion conservation Eq.(4) in the lumen is given by,

$$\begin{aligned} \frac{dN}{dt} = & 2\pi R(t) \times \Lambda(2R(t)(1 - \cos\theta(t))(\delta\rho_i - \delta\rho(t)) \\ & + \xi_i^2 \left( \frac{\partial}{\partial r} \delta\rho(t) \right) \Big|_{r=r_l} \end{aligned} \quad [4]$$

where  $\Lambda = \frac{k_B T \Lambda_i}{\rho_{cell}}$ . The total number of ions in the lumen is related to the lumen ion density by  $N = V\rho = V(\rho_{cell} + \delta\rho)$ . The geometrical relation  $r_l(t) = R(t) \sin\theta(t)$  holds at any given time. In this expression the ion density gradient at the lumen-cleft interface is deduced directly from the derivative of the expression of  $\delta\rho$  given by Eq. SI(2), taken at the value  $r = r_l$ . Indeed, according to the estimate given in section SI(2), the time dependent part of the cleft ion conservation Eq.(5) is completely negligible and one can use solutions of Eq.(9) with the slowly moving boundary  $r_l(t)$ .

The volume conservation Eq.(3) can be expressed in a similar way,

$$\begin{aligned} \frac{dV}{dt} = & 2\pi R(t) \Lambda_v (2R(t)(1 - \cos\theta(t))(2k_B T \delta\rho(t)) \\ & - \frac{2\sigma(t)}{R(t)} + \xi_V^2 \left( \frac{\partial}{\partial r} \delta P \right) \Big|_{r=r_l} \end{aligned} \quad [5]$$

The volume is easily expressed in terms of the lumen radius of curvature  $R(t)$  by  $V = \frac{\pi}{3} R(t)^3 (1 - \cos\theta(t))^2 (2 + \cos\theta(t))$ . The pressure gradient at the lumen-cleft interface is deduced from the derivative of expression Eq. SI(3) taken at  $r = r_l$ . Indeed as for the ion density equation, the time derivative part of the volume conservation equation can be safely neglected and Eq.(12) derived from Eq.(4) holds at all times.

We can then solve Eq. (3), Eq. SI(4) and Eq. SI(5) with the dynamical tension given by Eq.(15), to obtain  $R(t)$ ,  $\delta\rho(t)$  and  $\theta(t)$  provided we specify the initial conditions  $R(t=0)$ ,  $\delta\rho(t=0)$  and  $\theta(t=0)$ .

**SI(5): Analytical solutions of dynamical equations in the large lumen limit.** We discuss here the limit of large lumens ( $L - r_l \ll \xi_i$ ,  $L - r_l \ll \xi_V$ ) with small deviations from steady state values of the variables  $R, \theta, \delta\rho$ , in which it is possible to derive an analytical solution. In this regime, the leaks take the simple form  $\left( \frac{\partial}{\partial r} \delta P \right) \Big|_{r=r_l} \approx -\frac{(P - P_{ext})}{L - r_l}$ , and  $\left( \frac{\partial}{\partial r} \delta\rho \right) \Big|_{r=r_l} \approx -\frac{(\delta\rho - \delta\rho_{ext})}{L - r_l}$ , and the dynamical equations can be linearized. A further simplification is obtained by anticipating that the Laplace pressure is small compared to the osmotic pressure and thus can be neglected in the water conservation equation. Looking for exponentially relaxing quantities  $O(t) - O_s = \tilde{O} \exp st$ , where  $O(t)$  is any of the system variable, the compatibility requirement of the system of dynamical equations provides a simple second order equation  $ax^2 + bx + c = 0$  for the reduced variable  $x = \tau_c s$ . The expressions for  $a$ ,  $b$ , and  $c$  can be obtained analytically and read when  $\delta\rho_{ext} = 0$ ,  $\delta P_{ext} = 0$ :

$$\begin{aligned} a \simeq & \frac{\cos\theta_s}{2(1+\cos\theta_s)^2} \left( \frac{1}{\Lambda_V} + \frac{k_B T \rho_{cell}}{\Lambda} \right) \\ & + \frac{\cos\theta_s \xi_i}{2\Lambda_V \xi_V (1+\cos\theta_s)^2} \sqrt{\frac{k \delta\rho_i L}{\sigma_0 \sin\theta_s}} \end{aligned} \quad [6]$$

249  
250  
251  
252  
253  
254  
255  
256  
257  
258  
259  
260  
261  
262  
263  
264  
265  
266  
267  
268  
269  
270  
271  
272  
273  
274  
275  
276  
277  
278  
279  
280  
281  
282  
283  
284  
285  
286  
287  
288  
289  
290  
291  
292  
293  
294  
295  
296  
297  
298  
299  
300  
301  
302  
303  
304  
305  
306  
307  
308  
309  
310

$$b \simeq \frac{2 - \cos \theta_s - \cos^2 \theta_s}{\cos \theta_s} \left( \frac{k_B T \rho_{cell}}{\Lambda(1 + \cos \theta_s)} + \frac{\xi_i}{2\Lambda_V \xi_V \sin \theta_s^2} \sqrt{\frac{k_B T \delta \rho_i L}{\sigma_0 \sin \theta_s}} \right) - \left( \frac{\tau_c L (1 - \cos \theta_s) (k_B T \delta \rho_i)^{3/2}}{(1 + \cos \theta_s)^3 \sin \theta_s \xi_i \xi_V (\sigma_0 \sin \theta_s / L)^{1/2}} \right) \quad [7]$$

$$c \simeq \frac{2\tau_c L \tan \theta_s}{\xi_i \xi_V (1 + \cos \theta_s)^3} \frac{(k_B T \delta \rho_i)^{3/2}}{(\sigma_0 \sin \theta_s / L)^{1/2}} \quad [8]$$

For small enough  $\Lambda_v, \Lambda$ , and  $\delta \rho_i$  the three coefficients  $a, b, c$  and the discriminant  $b^2 - 4ac$  are positive. Furthermore  $\sqrt{b^2 - 4ac}$  is smaller than  $b$  and the two roots of the  $x$  equation are negative: the system relaxes monotonously to steady state in the linear regime. This regime is overdamped. Upon increasing any of the three parameters  $\Lambda_v, \Lambda$ , and  $\delta \rho_i$  the system gets into a regime in which the discriminant  $b^2 - 4ac$  of the equation becomes negative, while  $a, b, c$  are still positive. The two roots of the  $x$  equation are complex conjugate with a negative real part. The system relaxes to steady state, with oscillations of decreasing amplitude as time goes on. This is an underdamped regime. Upon increasing even more  $\lambda_w, \lambda_N$ , or  $\delta \rho_i$  the system reaches a point where  $b = 0$ . At that point the roots are pure imaginary and beyond the real part becomes positive, meaning that any fluctuation is amplified at the frequency defined by the imaginary part of  $x$ . This defines a Hopf bifurcation. The complete numerical solution confirms this scenario as already observed. Note that the feedback from the cortex viscosity is essential in obtaining the spontaneous oscillations which are being observed in a physiologically relevant domain of parameter space. Supplementary Films 2-4 display animations of the lumen dynamics in the different growth scenario. We give on Fig. 1 an

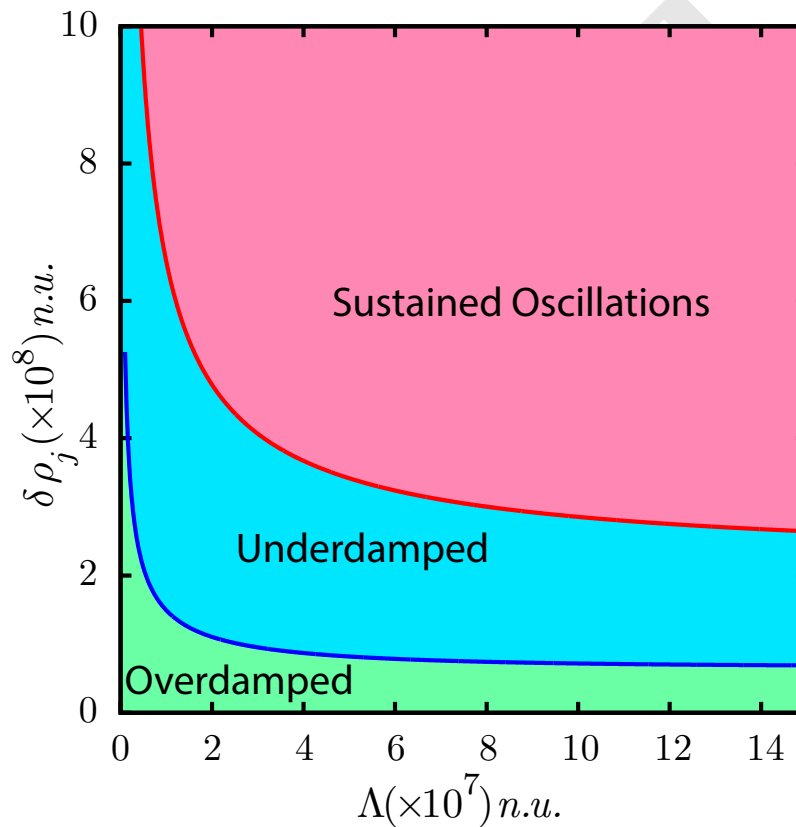

**Fig. 1.** Dynamical state diagram of the cell-lumen system in a  $\delta \rho_i - \Lambda$  plane, as obtained from the analytical estimate of SI (5) for  $\xi_V = 0.49$ ,  $\xi_i = 0.50$ ,  $\Lambda_v = 1$  n.u.,  $\sigma_0 = 10^7$  n.u.,  $\delta \rho_{ext} = -2 \times 10^6$  n.u., and  $\rho_{cell} = 10^9$  n.u.

example of phase diagram in a  $\delta \rho_i, \Lambda$  plane for prescribed  $\Lambda_v$  based on the analytical expressions above. One clearly sees the independence of  $\Lambda$  for large values and the succession of the overdamped, underdamped, oscillatory regimes for increasing  $\delta \rho_i$ . The agreement of the analytic expression of the Hopf phase boundary and the overdamped-underdamped regimes cross-over with the numerical calculation is qualitative since, the approximate expression of the leaks does not hold true in general, for the physically relevant values of  $\delta \rho_i$  where we have presented the full solution of the dynamics using numerical methods.

311  
312  
313  
314  
315  
316  
317  
318  
319  
320  
321  
322  
323  
324  
325  
326  
327  
328  
329  
330  
331  
332  
333  
334  
335  
336  
337  
338  
339  
340  
341  
342  
343  
344  
345  
346  
347  
348  
349  
350  
351  
352  
353  
354  
355  
356  
357  
358  
359  
360  
361  
362  
363  
364  
365  
366  
367  
368  
369  
370  
371  
372

374  
375  
376  
377  
378  
379  
380  
381  
382  
383  
384  
385  
386  
387  
388  
389  
390  
391  
392  
393  
394  
395  
396  
397  
398  
399  
400  
401  
402  
403  
404  
405  
406  
407  
408  
409  
410  
411  
412  
413  
414  
415  
416  
417  
418  
419  
420  
421  
422  
423  
424  
425  
426  
427  
428  
429  
430  
431  
432  
433  
434

435  
436  
437  
438  
439  
440  
441  
442  
443  
444  
445  
446  
447  
448  
449  
450  
451  
452  
453  
454  
455  
456  
457  
458  
459  
460  
461  
462  
463  
464  
465  
466  
467  
468  
469  
470  
471  
472  
473  
474  
475  
476  
477  
478  
479  
480  
481  
482  
483  
484  
485  
486  
487  
488  
489  
490  
491  
492  
493  
494  
495  
496

| Input parameters     | Definition                                                                                                                                              | Estimated values                    | Normalized units         |
|----------------------|---------------------------------------------------------------------------------------------------------------------------------------------------------|-------------------------------------|--------------------------|
| $k_B T$              | Boltzmann factor                                                                                                                                        | 4.1 pN-nM                           | 1 <i>n.u.</i>            |
| $L$                  | Lateral size of cell                                                                                                                                    | 10 $\mu m$ range                    | 1 <i>n.u.</i>            |
| $R$                  | Radius of curvature of lumen                                                                                                                            | 10 $\mu m$ range                    | $\sim 1$ <i>n.u.</i>     |
| $r_l$                | Position of lumen junction with the cleft in polar coordinates                                                                                          | $\mu m$ range                       | $\sim 1$ <i>n.u.</i>     |
| $\theta, (\theta_s)$ | Angle, (steady state angle) between the tangent to the lumen at $r_l$ , and the symmetry plane                                                          | $0, \pi/2$ range                    | $0, \pi/2$ range         |
| $\Lambda_V$          | Water permeation coefficient                                                                                                                            | $\sim 10^{-10} - 10^{-11} m^3/(Ns)$ | $\sim 1$                 |
| $\Lambda$            | Ion permeation coefficient                                                                                                                              | $\sim 10^{-9} - 10^{-7} m/s$        | $\sim 10^7 - 10^{10}$    |
| $\delta\rho_i$       | Total ion density difference between lumen and cell such that passive and active fluxes balance as the measure of secretory efficiency of the membrane. | $\sim 0.1 - 10$ mM                  | $\sim 10^8 - 10^{10}$    |
| $\delta\rho_{ext}$   | Ion density outside the cell minus cell ion density                                                                                                     | $\sim (0.1 - 1)$ mM                 | $\sim (-10^7)$           |
| $\sigma_0$           | Sum of cortex and membrane tension in the lumen at steady state                                                                                         | $\sim 10^{-4}$ N/m                  | $\sim 10^7$              |
| $\tilde{\sigma}_0$   | Sum of cortex and membrane tension in the cleft minus the cell-cell adhesion energy $E$                                                                 | $\sim 10^{-4}$ N/m                  | $\sim 10^7$              |
| $\xi_i$              | Characteristic length scale the ion leak in the cleft                                                                                                   | $\mu m$ range                       | $\sim 0.1 - 0.5$         |
| $\xi_V$              | Characteristic length scale the water leak in the cleft                                                                                                 | $\mu m$ range                       | $\sim 0.1 - 0.5$         |
| $\tau_c$             | Cortex crossover time                                                                                                                                   | $\sim 10^2 - 10^4$ s                | $\sim 10^{-8} - 10^{-9}$ |

Table 1. Estimation of the values of Physical parameters for cell-cell interface lumen formation model

| $\delta\rho_i$     | $r_0^u$  | $R^u$    | $r_l^{ini}$ | $R^{ini}$ |
|--------------------|----------|----------|-------------|-----------|
| $1.0 \times 10^8$  | 0.248745 | 0.497489 | 0.251232    | 0.502464  |
| $1.35 \times 10^8$ | 0.161707 | 0.323414 | 0.163324    | 0.326648  |
| $1.38 \times 10^8$ | 0.158089 | 0.316179 | 0.159670    | 0.319340  |

Table 2. Initial values of  $r_0^{ini}$ ,  $R^{ini}$  for obtaining numerical solution of dynamical behavior in Fig. 3 and Fig. 4. The values are obtained by estimating first the value of  $R^u$  and  $r_0^u$  at the unstable branch at the same  $\delta\rho_i$  and then initial values are used as 1% more than the value at the unstable branch.

## Legends for SI movies

The SI movies exemplify the dynamics of lumen growth in the 3 different regimes obtained from our model

**Movie 1:** Animation of the lumen growth dynamics in the monotonous growth regime. Volume, ion density as well as the lumen shapes are presented. Note that the concentration of the lumen is coded by different intensity of green color. The simulation parameters are the same as in the main text.

**Movie 2:** Animation of the lumen growth dynamics in the sustained oscillation regime. Volume, ion density as well as the lumen shapes are presented. Note that the concentration of the lumen is coded by different intensity of green color. The simulation parameters are the same as in the main text.

**Movie 3:** Animation of the lumen growth dynamics in the damped oscillation regime. Volume, ion density as well as the lumen shapes are presented. Note that the concentration of the lumen is coded by different intensity of green color. The simulation parameters are the same as in the main text.
